# Supplementary material for: Thymoquinone-loaded lipid nanocapsules with promising anticancer activity for colorectal cancer
Source: Royal Society of Chemistry journal article supplement (doi:10.1039/d3na00445g), 2023-01-01
Supplement: d3na00445g1.pdf [file d3na00445g1.pdf]

## Supplementary data

### Thymoquinone loading lipid nanocapsules promising anticancer activity of colorectal cancer

Mouna Selmi<sup>1</sup>, Abir Salek<sup>1</sup>, Mahassen Barboura<sup>1</sup>, Leila Njim<sup>2</sup>, Amine Trabelsi<sup>1,3</sup>, Aida Lahmar<sup>1</sup>, Nolwenn Lautram<sup>4</sup>, Emilie Roger<sup>4</sup>, Tarek Baati<sup>5\*</sup>, Leila chekir Ghedira<sup>1</sup>

<sup>1</sup>Laboratoire des substances naturelles bioactives et biotechnologie UR17ES49, Faculté de médecine dentaire, Université de Monastir.

<sup>2</sup>Service d'Anatomie Pathologique, CHU de Monastir, Université de Monastir, Tunisia.

<sup>3</sup>Laboratoire de Pharmacognosie, Faculté de pharmacie, Université de Monastir.

<sup>4</sup>Univ Angers, INSERM, CNRS, MINT, SFR-ICAT, F-49000 Angers, France.

<sup>5</sup>Laboratoire des Substances Naturelles, Institut National de Recherche et d'Analyse Physico-chimique, Biotechpôle Sidi Thabet, 2020 Tunisia.

\* Corresponding author : [tarek.baati@gmail.com](mailto:tarek.baati@gmail.com)

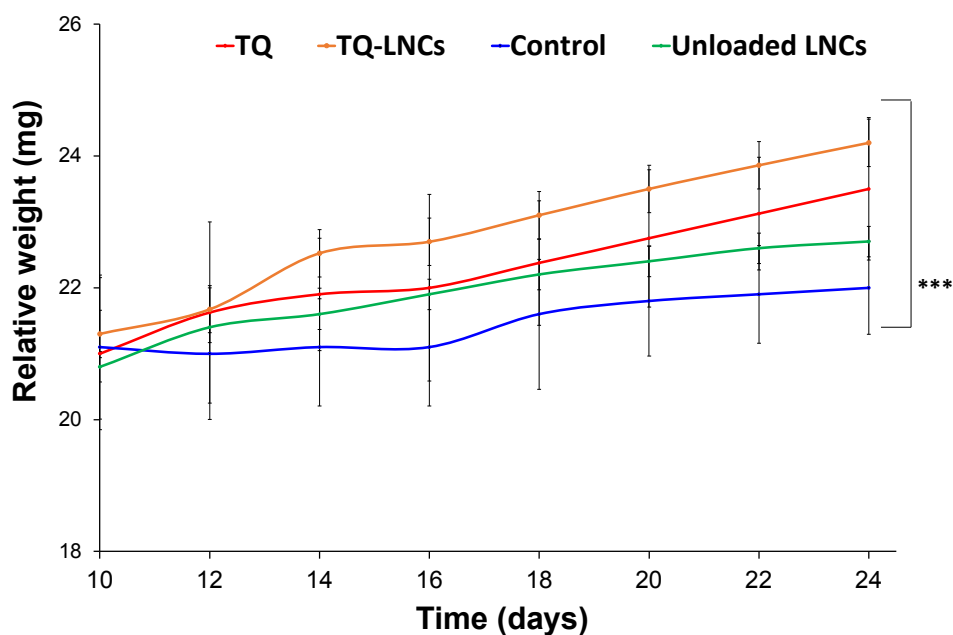

**Figure S1** Relative weight of treated mice after intra-tumoral treatment with PBS (Control), unloaded LNCs, free TQ and TQ-LNCs with a dose of 5mg.kg TQ (n=6, \*\*\*: P<0.05 versus control group).

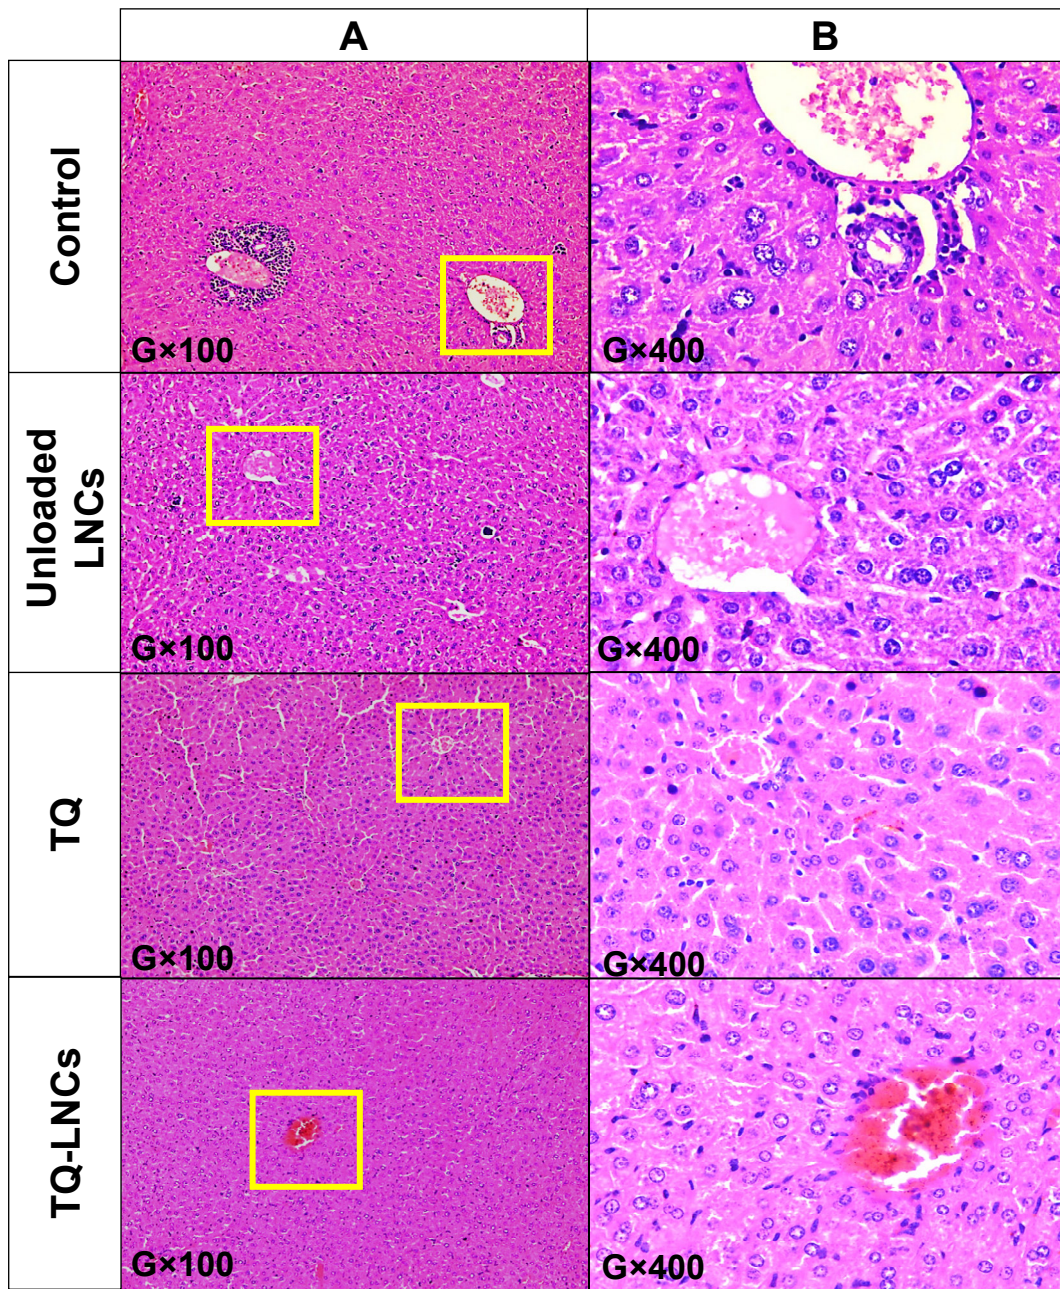

**Figure S2** Histopathology assessment of liver in colorectal cancer subcutaneous animal after intra-tumoral treatment with PBS (Control), unloaded LNCs, free TQ and TQ-LNCs with a dose of 5mg.kg TQ. **B** is the magnification of squared area.

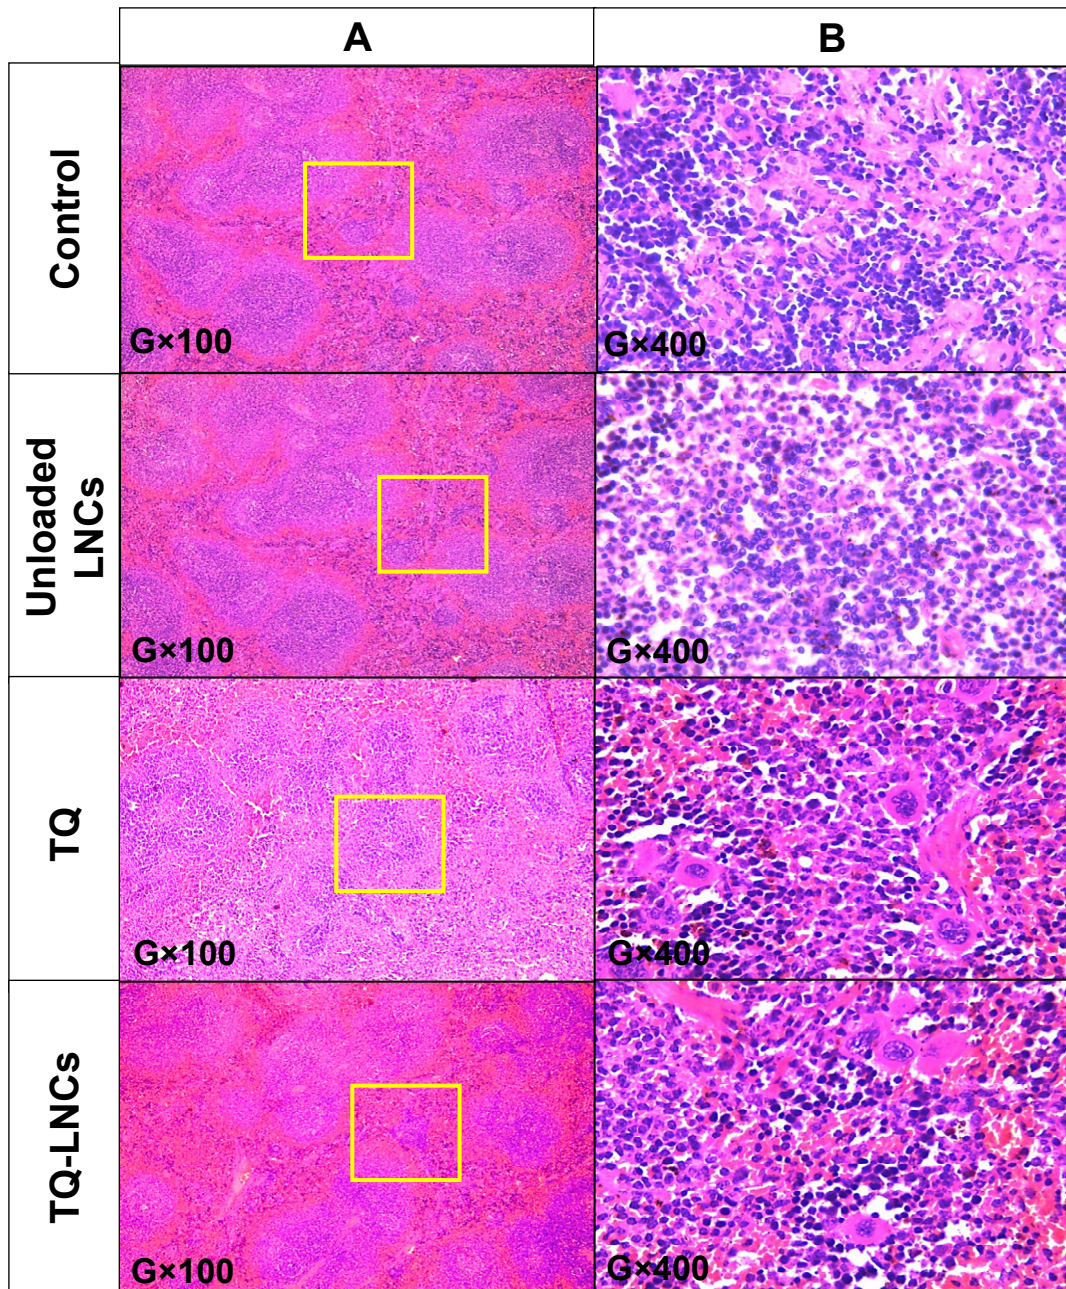

**Figure S3** Histopathology assessment of spleen in colorectal cancer subcutaneous animal after intra-tumoral treatment with PBS (Control), unloaded LNCs, free TQ and TQ-LNCs with a dose of 5mg.kg TQ. **B** is the magnification of squared area.

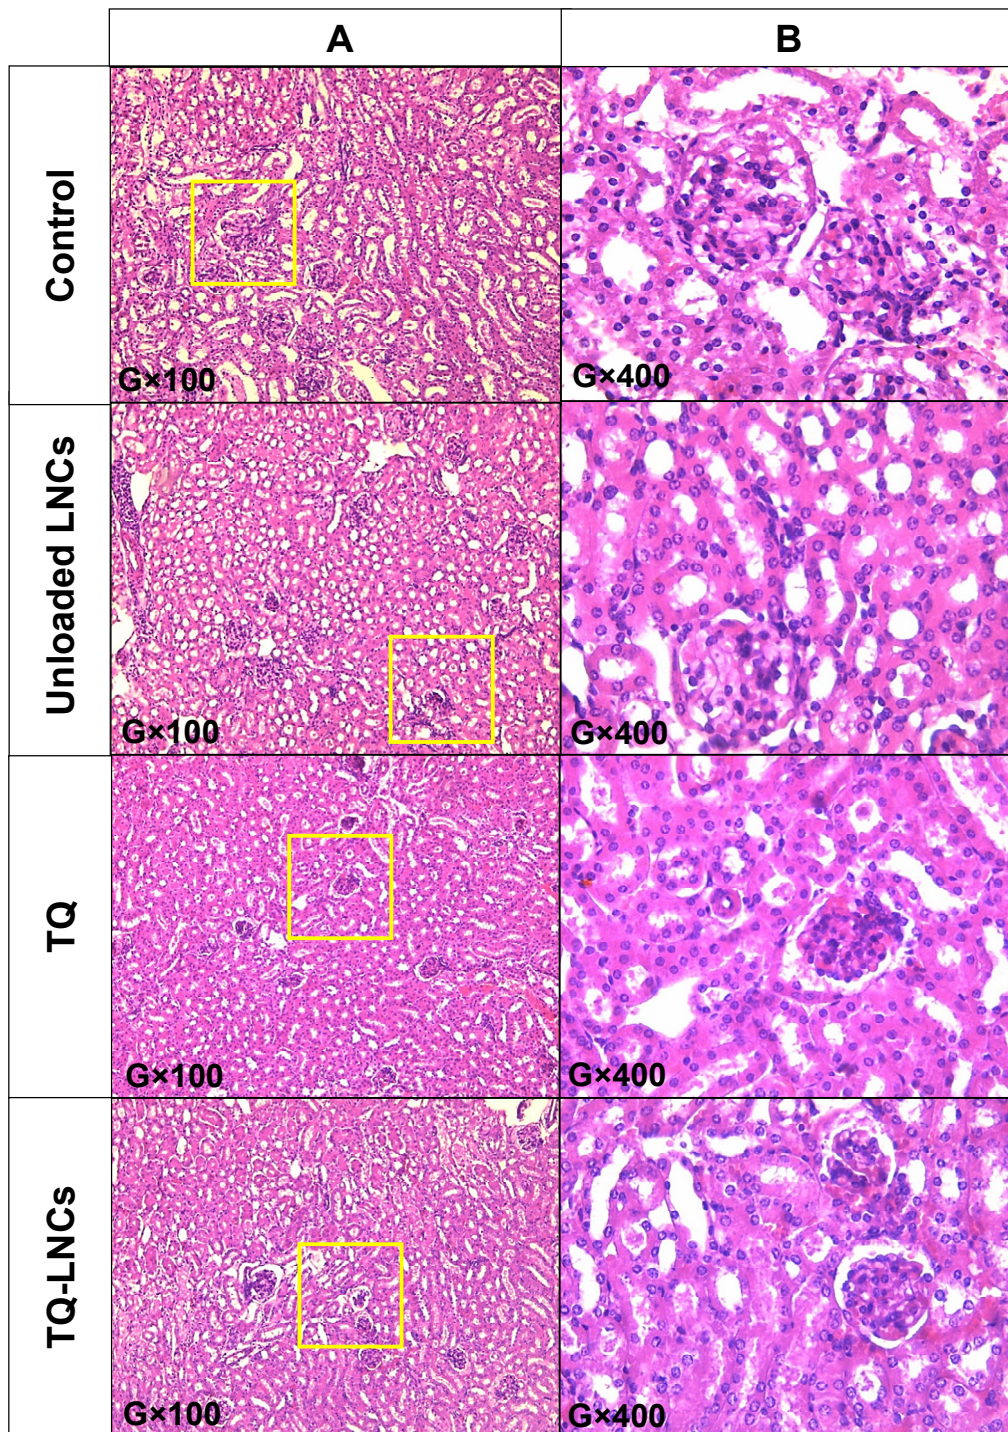

**Figure S4** Histopathology assessment of kidney in colorectal cancer subcutaneous animal after intra-tumoral treatment with PBS (Control), unloaded LNCs, free TQ and TQ-LNCs with a dose of 5mg.kg TQ. **B** is the magnification of squared area.

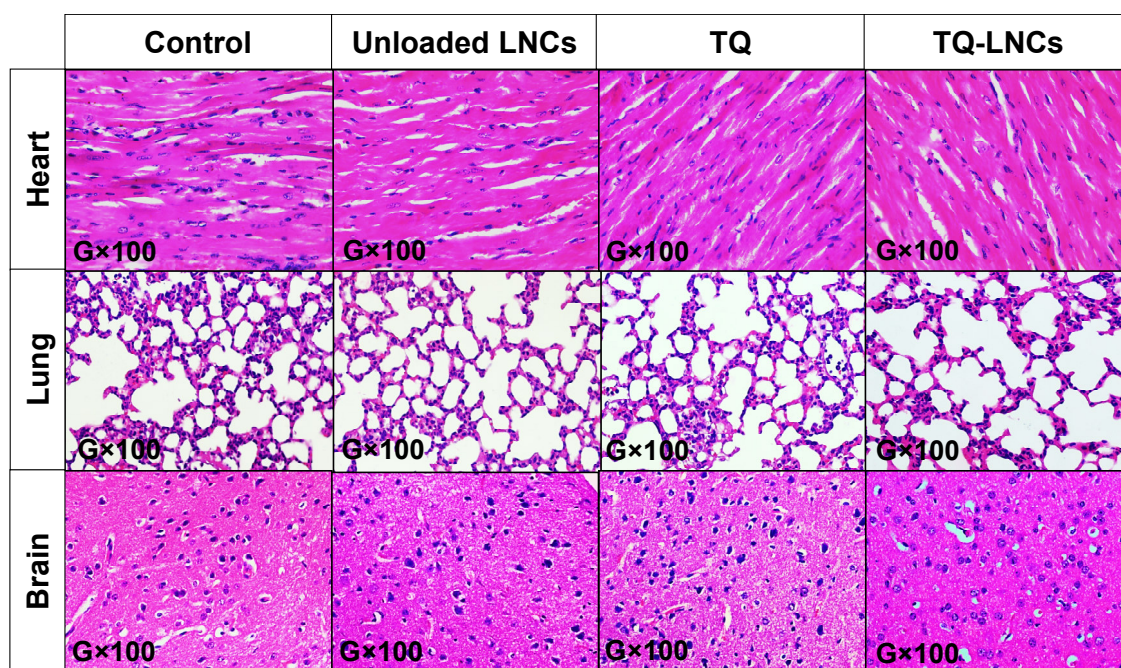

**Figure S5** Histopathology assessment of heart, lung and brain in colorectal cancer subcutaneous animal after intra-tumoral treatment with PBS (Control), unloaded LNCs, free TQ and TQ-LNCs with a dose of 5mg.kg TQ.
